# Supplementary material for: Biocidal properties of TiO2 powder modified with Ag nanoparticles
Source: Royal Society of Chemistry journal article supplement (doi:10.1039/c2tb00337f), 2013-01-01
Supplement: c2tb00337f.pdf [file c2tb00337f.pdf]

Supporting Information to paper

"Biocidal properties of TiO<sub>2</sub> powder modified with Ag nanoparticles"

Nina Perkas, Anat Lipovsky, Galina Amirian, Yeshayahu Nitzan and Aharon Gedanken

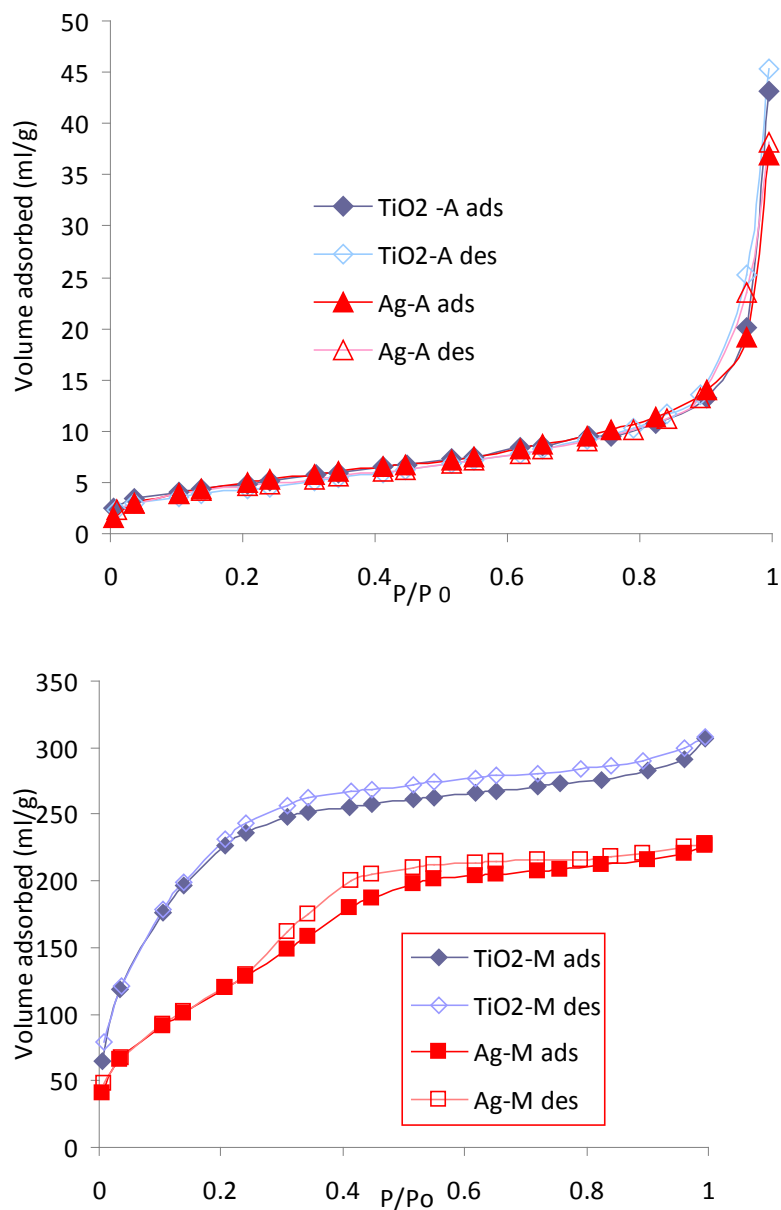

Figure SI-1. N<sub>2</sub>-adsorption-desorption isotherms of Ag-TiO<sub>2</sub> composites.
